# Supplementary material for: Telehealth for patients with chronic obstructive pulmonary disease (COPD): a systematic review and meta-analysis protocol
Source: PubMed Central journal article supplement — BMJ Open. 2018 Sep 19;8(9):e021865. doi: 10.1136/bmjopen-2018-021865 (PMC6150147; doi:10.1136/bmjopen-2018-021865), 2018-09-19
Supplement: bmjopen-2018-021865.draft_revisions.pdf [file bmjopen-2018-021865.draft_revisions.pdf]

# BMJ Open

BMJ Open is committed to open peer review. As part of this commitment we make the peer review history of every article we publish publicly available.

When an article is published we post the peer reviewers' comments and the authors' responses online. We also post the versions of the paper that were used during peer review. These are the versions that the peer review comments apply to.

The versions of the paper that follow are the versions that were submitted during the peer review process. They are not the versions of record or the final published versions. They should not be cited or distributed as the published version of this manuscript.

BMJ Open is an open access journal and the full, final, typeset and author-corrected version of record of the manuscript is available on our site with no access controls, subscription charges or pay-per-view fees (<http://bmjopen.bmj.com>).

If you have any questions on BMJ Open's open peer review process please email [info.bmjopen@bmj.com](mailto:info.bmjopen@bmj.com)

# BMJ Open

## Telehealth for Chronic Obstructive Pulmonary Disease (COPD) Patients: a Systematic Review and Meta-analysis Protocol

|                               |                                                                                                                                                                                                                                                                                                                                                                                                                                                                                                                                                                                                                                                                                                                                                                                                                                                                                                                                                                                                                                                                                                                                                                                                                                                             |
|-------------------------------|-------------------------------------------------------------------------------------------------------------------------------------------------------------------------------------------------------------------------------------------------------------------------------------------------------------------------------------------------------------------------------------------------------------------------------------------------------------------------------------------------------------------------------------------------------------------------------------------------------------------------------------------------------------------------------------------------------------------------------------------------------------------------------------------------------------------------------------------------------------------------------------------------------------------------------------------------------------------------------------------------------------------------------------------------------------------------------------------------------------------------------------------------------------------------------------------------------------------------------------------------------------|
| Journal:                      | <i>BMJ Open</i>                                                                                                                                                                                                                                                                                                                                                                                                                                                                                                                                                                                                                                                                                                                                                                                                                                                                                                                                                                                                                                                                                                                                                                                                                                             |
| Manuscript ID                 | bmjopen-2018-021865                                                                                                                                                                                                                                                                                                                                                                                                                                                                                                                                                                                                                                                                                                                                                                                                                                                                                                                                                                                                                                                                                                                                                                                                                                         |
| Article Type:                 | Protocol                                                                                                                                                                                                                                                                                                                                                                                                                                                                                                                                                                                                                                                                                                                                                                                                                                                                                                                                                                                                                                                                                                                                                                                                                                                    |
| Date Submitted by the Author: | 25-Jan-2018                                                                                                                                                                                                                                                                                                                                                                                                                                                                                                                                                                                                                                                                                                                                                                                                                                                                                                                                                                                                                                                                                                                                                                                                                                                 |
| Complete List of Authors:     | Gaveikaite, Violeta; Philips Research, ; Aristotle University of Thessaloniki School of Medicine, Lab of Computing and Medical Informatics<br>Fischer, Claudia; Royal Philips Netherlands B.V. acting through Philips Research, Research - Chronic Disease Management; Institut fur Hohere Studien-Institute for Advanced Studies<br>Schonenberg, Helen ; Royal Philips Netherlands B.V. acting through Philips Homecare,<br>Pauws, Steffen; Royal Philips Netherlands B.V. acting through Philips Research, Research - Chronic Disease Management; Tilburg University Tilburg center for Cognition and Communication<br>Kitsiou, Spyros; University of Illinois at Chicago College of Medicine,<br>Chouvarda, Ioanna; Aristotle University of Thessaloniki School of Medicine, Lab of Computing and Medical Informatics<br>Maglaveras, Nicos; Aristotle University of Thessaloniki School of Medicine, Lab of Computing and Medical Informatics; University of Illinois at Chicago, Department of Electrical Engineering and computer Sciences<br>Roca, Josep; Institut d'Investigacions Biomediques August Pi i Sunyer, Hospital Clinic de Barcelona, Universitat de Barcelona; Center for Biomedical Network Research in Respiratory Diseases (CIBERES), |
| Keywords:                     | chronic obstructive pulmonary disease, telehealth, systematic review, meta-analysis, Telemedicine < BIOTECHNOLOGY & BIOINFORMATICS                                                                                                                                                                                                                                                                                                                                                                                                                                                                                                                                                                                                                                                                                                                                                                                                                                                                                                                                                                                                                                                                                                                          |
|                               |                                                                                                                                                                                                                                                                                                                                                                                                                                                                                                                                                                                                                                                                                                                                                                                                                                                                                                                                                                                                                                                                                                                                                                                                                                                             |

SCHOLARONE™  
Manuscripts

# Telehealth for Chronic Obstructive Pulmonary Disease (COPD) Patients: a Systematic Review and Meta-analysis Protocol

## Authors

Violeta Gaveikaite<sup>1,2</sup>, Claudia Fisher<sup>2,6</sup>, Helen Schonenberg<sup>2</sup>, Steffen Pauws<sup>2,3</sup>, Spyros Kitsiou<sup>4</sup>, Ioanna Chouvarda<sup>1</sup>, Nicos Maglaveras<sup>1,5</sup>, Josep Roca<sup>7</sup>

## Affiliations

- 1 Department of Medical Informatics, Aristotle University of Thessaloniki, Thessaloniki, Greece
- 2 Department of Chronic Disease Management, Philips Research, Eindhoven, The Netherlands
- 3 Tilburg Center for Communication and Cognition, Tilburg University, Tilburg, The Netherlands
- 4 Department of Biomedical and Health Information Sciences, University of Illinois at Chicago, Chicago, USA
- 5 Department of Electrical Engineering and Computer Sciences, University of Illinois at Chicago, Chicago, USA
- 6 Institute for Advanced Studies, Health Economics and Health Policy, Vienna, Austria
- 7 Servicio de Neumología, Hospital Clínic de Barcelona, Barcelona, Spain

## Corresponding author

Violeta Gaveikaite; HTC 34, 1.057, Eindhoven, The Netherlands, tel.nr +31 (0)70 770 9180, violeta.gaveikaite@philips.com

## Keywords

Meta-analysis, systematic review, telemedicine, telehealth, chronic obstructive pulmonary disease

## Word count

2193

## Study registration number:

International Prospective Register for Systematic Reviews (PROSPERO): CRD42018083671.

## ABSTRACT

### Introduction

Chronic Obstructive Pulmonary Disease (COPD) is a highly prevalent chronic disease characterized by persistent respiratory symptoms. A major focus of COPD interventional studies is directed towards prevention of exacerbations leading to hospital readmissions. Telehealth as a method of remote patient monitoring and care delivery may be implemented to reduce hospital readmissions and improve self-management of chronic disease. Prior reviews have not systematically assessed the efficacies of various telehealth functionalities on COPD patients at different stages of disease severity. We aim to evaluate which COPD telehealth interventions, classified by their functionalities, are most effective in improving COPD patient management measured by both clinical and resource utilization outcomes.

### Methods and analysis

We will conduct a systematic review which will include randomized controlled trials comparing the efficacy of telehealth interventions versus standard care in COPD patients with confirmed disease severity based on FEV% levels. Trials will be identified from searches of multiple electronic databases (CENTRAL, MEDLINE, EMBASE and CINAHL). Telehealth is described as remote monitoring and delivery of care where patient data or clinical information is routinely or continuously collected and/or computed, presented to the patient and transferred to a clinical care institution for feedback, triage and intervention by a clinical specialist. Two authors will independently screen articles for inclusion, assess risk of bias and extract data. We will pool studies into a meta-analysis if the interventions, technologies, participants and underlying clinical questions are homogenous enough. We will use a random-effects model, as we expect some heterogeneity between interventions. In cases where a meta-analysis is not possible, we will synthesize findings qualitatively. We will also assess the quality of evidence for the main outcomes using GRADE.

### Ethics and Dissemination

Research ethics approval is not required. The findings will be disseminated through publication in a peer-reviewed journal.

### Word count

294

**Strengths and limitations of this study**

- This systematic review will update the knowledge on efficacy of telehealth interventions in management of COPD patients. We will propose to look at all telehealth applications and functionalities and to provide a typology for the telehealth interventions of the COPD patient's remote service delivery
- This article will help clinicians working in the COPD field to select the most effective telehealth intervention for the different COPD severity groups to improve COPD management;
- Despite considerable heterogeneity in reporting in published clinical trials and limited data, we expect to demonstrate considerable promise for the successful implementation of telehealth services to remotely manage COPD patients.

## INTRODUCTION

Chronic Obstructive Pulmonary Disease (COPD) is a highly prevalent disease that is characterized by persistent respiratory symptoms due to airway and/or alveolar abnormalities caused by significant exposure to noxious particles or gases.[1] COPD results in high societal healthcare expenditures and resource utilization.[2,3] The estimated annual economic burden of COPD in terms of conventional direct (healthcare utilization) and indirect (lost production) costs is 141.4 billion euros in Europe (2011).[4] The costs of COPD are strongly related to disease severity. The major components of direct costs are hospitalizations (for very severe COPD) and drugs (all other severity stages).[5] Telehealth involves the remote exchange of data between patients and healthcare professionals as part of the patient's diagnosis and healthcare management.[6,7] Telehealth interventions for management of COPD patients were introduced more than 20 years ago, but the evidence base for the value of telehealth is limited and contradictory.[8] Published systematic reviews on telehealth interventions for the clinical management of COPD patients only focus on the application of specific services (e.g. hospital to home)[9,10], specific functions (e.g. smart phone intervention)[11,12] or the experience of clinical professionals (e.g. nursing professionals).[13] Even if a recent systematic reviews focuses on a particular telehealth application or functionality, a lack of established taxonomy in the field greatly limits their value for clinicians. In our systematic review, we propose to look at all telehealth applications and functionalities and to provide a typology for the telehealth interventions of the COPD patient's remote service delivery. This will allow us to describe the use of different telehealth functions across a range of healthcare fields, from health behavior change interventions to remote patients monitoring such as vital signs observations. This allows us to focus on similarities in mechanisms of action for a particular device or function and to suggest where it might be useful in new remote service selections for the COPD patients' clinical management. A number of systematic reviews have evaluated the efficacy of telehealth interventions on clinical outcomes in patients diagnosed with COPD. However, the findings vary widely; they are diverse[13,14] and of poor methodological quality.[15] This may be due to lack of reporting on important patient characteristics, lack of validated data collection instruments and lack of high quality reporting. [12,14] However, telehealth interventions are very complex to evaluate because of their dynamic nature: they are designed for a very specific setting and efficacy is impacted by the behavior of those delivering (resistance to new ICT applications) as well as receiving the intervention (non-adherence to intervention).[15,16] This lack of evidence is a barrier for further deployment or scaling up of telehealth services.

## OBJECTIVES

The aim of this systematic review will be 1) describe how telehealth may be used for the remote management of COPD patients that have been evaluated in randomized controlled trials; 2) derive typology on these telehealth solutions for COPD patients remote management based on their application for clinical services and specific functionalities 3) assess the effectiveness of telehealth solutions for improving health and health service outcomes in COPD patients stratified according to disease severity.

## METHODS

This systematic review protocol was registered in the Prospero Registry (Number obtained: CRD42018083671). The systematic review will be conducted according to the Cochrane Handbook for Systematic Reviews of Interventions[17] and reported according to the PRISMA-P (the Preferred Reporting Items for Systematic reviews and Meta-Analyses for Protocols 2015) methodology.[18,19]

## Eligibility criteria

The PICO components (Population, Intervention, Comparator and Outcomes) and study design were used to define study selection criteria.

### Participants

Eligible for inclusion are studies involving patients with a COPD diagnosis based on reported FEV1% (or reported as a COPD GOLD grade). [1] If a reported patient population is mixed, for instance including patients presenting with asthma, this study will be excluded.[20] Studies that include additional medical conditions as well as COPD will be retained if the outcomes specific to the COPD group are reported separately.

### Intervention group: telehealth services

The intervention group is described as patients receiving telehealth as part of a COPD management plan. Telehealth involves the remote exchange of data between a patient and healthcare professionals as part of the patient's diagnosis and healthcare management.[6,7]

The telehealth intervention can involve any IT tool designed for clinical support: an assessment, consultation, triage or intervention performed by the care provider (telemedicine nurse, clinician or service provider, or back-office feedback).

The telehealth component of the management plan may consist of the following functional components: care provider consultations, vital signs monitoring, education/prevention modules, lifestyle coaching, etc. We will exclude studies reporting home mechanical ventilation procedures.

### Comparator: standard care

The definition of standard care, if retrievable, will be reported. Standard care is controversial and may vary widely between hospitals and countries[21] therefore we include the study if a description of the care has been provided without further restrictions on the type of standard care (care without telehealth component).

### Study design

Eligible studies for inclusion are:

Randomized clinical trials (RCTs);

Cluster RCTs;

Controlled trials, if they have a randomization component (feasibility and pilots studies are included[22])

### Search strategy

#### *Electronic databases*

We will identify studies through systematic searches of the following electronic databases: MEDLINE via PubMed, EMBASE, The Cochrane Central Register of Controlled Trials (CENTRAL) and CINAHL. The preliminary search strategy for CINAHL (Appendix 1) will be adapted for use in the other databases. The Cochrane sensitivity-maximizing RCT filter will be applied to MEDLINE and adaptations of it to the other databases except CENTRAL. We will search all databases from 2000 to the present and will impose no restriction on language.

#### *Hand searching literature*

We will supplement the main search strategy with manual searches of reference lists of all relevant primary studies and systematic reviews to identify any additional studies not captured by our original search. We will also contact field experts and search the ClinicalTrials.gov Registry for potentially eligible studies.

### Reference management

The bibliographic details of all retrieved articles will be stored in Mendeley, a reference management software package. Duplicates will be identified and removed using the Mendeley reference management software.

## Study selection and data extraction strategy

### *Screening and selection of studies*

Two authors will independently assess the title and abstract of all identified papers as well as the articles that passed the title and abstract screening based on pre-defined eligibility criteria. Any disagreements between reviewers will be resolved through discussion or adjudication by a third reviewer. The data extraction form[23] will be adapted to our systematic review and adjusted for optimal data collection through a pilot of several full texts of several included RCTs. Any disagreement arising in the full text screening stage between reviewers will be resolved through discussion. If agreement cannot be reached, a third reviewer will mediate. All studies that do not fulfil all of the criteria will be excluded and the reasons for their exclusion will be noted. We will identify and collate multiple reports of the same study so that each study rather than each report is the unit of interest in the review.

### *Data extraction and management*

Data will be independently extracted from the included studies by the first author (VG) and recorded on a predesigned extraction form. A second reviewer will check the data for consistency against the published manuscripts to identify any errors. In case of missing data, we will contact the corresponding authors of the included studies where possible. Among other elements, the following data will be captured from studies to be included in the review:

Study characteristics: study design, comparator, duration, sample size, setting, country, participant characteristics: age and sex; FEV%, comorbidities, asthma profile (with/without), smoking status  
Intervention characteristics: functionality description (goal, technical details, how service works), how data is collected, how data is reported, adverse events reporting, sustainability of intervention.  
Feedback criteria: healthcare provider; timing: synchronous or asynchronous; nature: manual or automated;

### **Outcomes: Clinical outcomes collection**

Although we will extract all reported outcomes, we will report on the most common outcomes for COPD clinical trials only.[24]

#### *Primary outcomes*

Hospital readmissions. COPD-related hospitalizations and all-cause hospitalizations will be reported. We will differentiate between count and dichotomous data (e.g. the number of participants in each intervention group who experience at least one event vs. number of events in each intervention group).

Exacerbations – Exacerbation rate is a commonly reported outcome.[24] The definition of exacerbations and their severity needs to be standardized to allow comparisons between different interventions in different settings.[25,26] As exacerbations can be reported in different ways, the data collection form allows the following to be recorded: number of exacerbations, or exacerbation rate and etc. (it can be classified based on patient disease severity as well).

All-cause mortality. Number of patients who died during the study per study group.

#### *Secondary outcomes*

Health-related Quality of Life: disease specific or non-disease specific quality of life reported by a validated instrument.

Physical activity measurements (any type reported by validated measurement).

COPD related costs (total and program related; if available also indirect costs).

### **Risk of bias assessment**

Two authors will independently assess risk of bias for each study included in the review using the Cochrane Collaboration Risk of Bias criteria, which assess the following domains: sequence generation; allocation concealment; blinding of participants and personnel (performance bias);



1  
2  
3 blinding of outcome assessment, whether incomplete outcome data were adequately addressed; and  
4 whether there was selective outcome reporting.[27]

5 In accordance with the Cochrane risk of bias assessment tool, we will grade each potential source of  
6 bias as high, low or unclear and provide a quote from the study report together with a justification  
7 for our judgment in the 'Risk of bias' table.

### 8 9 **Data synthesis**

10 Risk ratios (RR) will be determined for outcome measures of dichotomous variables. Where possible,  
11 RR will be pooled using a random effects model. The standard mean difference will be calculated for  
12 continuous data variables in the absence of significant clinical heterogeneity.[28]Statistical  
13 heterogeneity will be analyzed using the I<sup>2</sup> statistic. To confirm reliability of the summary estimate,  
14 95% confidence intervals (CI) will be calculated. If there is important clinical heterogeneity among the  
15 included studies or data are reported using different scales, we will summarize the findings of the  
16 studies narratively by direction of effect and/or statistical significance.

### 17 18 **Quality of Evidence Assessment**

19 A Quality of Evidence Assessment is performed to determine the extent to which we can be  
20 confident that an estimate of effect is close to the true quantity/value, i.e. it is not distorted by  
21 internal or external bias within and across studies. The assessment will be done with the GRADE  
22 system.[29] Quality of evidence assessment will be performed by outcome of interest.

### 23 24 **Dealing with missing data**

25 Authors will be contacted to obtain unreported data.

### 26 27 28 **Assessment of heterogeneity and reporting biases**

29 We will assess clinical heterogeneity between studies by comparing the characteristics of the study  
30 populations, interventions and outcome measures. Statistical heterogeneity will be assessed with the  
31 I<sup>2</sup> and  $\chi^2$  (chi-square) statistic measures. The assessment of reporting biases for the primary  
32 outcomes of interest will be explored using funnel plots if we are able to pool more than 10 trials per  
33 outcome of interest.  
34  
35  
36  
37  
38  
39  
40  
41  
42  
43  
44  
45  
46  
47  
48  
49  
50  
51  
52  
53  
54  
55  
56  
57  
58  
59  
60

## DISCUSSION

Overall, the systematic review outlined in this protocol aims to identify, assess and synthesize using meta-analytic methods all available evidence on the effects of telehealth interventions for the management of COPD patients. Our systematic review will evaluate which COPD telehealth interventions, classified by their functionalities, are most effective in improving COPD patient management measured by both clinical and resource utilization outcomes. It will allow better clinical service selection, which aims to tailor the telehealth services to the specific COPD disease severity and patient needs.[30] Based on published randomized clinical trials, it will describe the telehealth solutions usability and efficacy in terms of clinical outcomes and service utilization for the COPD patients' remote management. Clinical outcomes reporting will be focused on the patient profile (comorbidities, FEV%, no asthma cases) which strengthens this systematic review and facilitates the evidence implementation in the future's individual patient service selection procedures. Heterogeneous reporting in trials on telehealth and the limited number of trials for some of the interventions, foreseen based on a scoping search, may limit our ability to draw conclusions on telehealth efficacy following the meta-analysis. The gathered information will help to derive the typology of telehealth solutions for COPD patients' remote management based on their application for the clinical services and specific functionalities

**Ethics and dissemination**

Violeta Gaveikaite, Steffen Pauws and Helen Schonenberg are employees of Philips research, Eindhoven, the Netherlands. Other authors declare that they have no conflict of interest. No research ethics approval is required for this systematic review as no confidential patient data will be used. The findings will be disseminated through publication in a peer-reviewed journal.

**Acknowledgements**

The authors thank the reviewers of the manuscript for their constructive feedback.

**Authors' contributions**

VG, SK, SP, HS, CF developed the idea and designed the study protocol. VG, SK designed and wrote the search strategy and the first protocol draft; VG, SK, SP planned the data extraction and statistical analysis; HS, IC, SP, JR, NM provided critical insights. All authors have approved and contributed to the final written manuscript.

**Funding**

This publication has received funding from the European Union's Horizon 2020 research and innovation program - Marie Skłodowska-Curie Actions grant agreement no. 676201 - CHES - Connected Health Early Stage Researcher Support System.

## REFERENCES

- 1 Global Initiative for Chronic Obstructive Lung Disease Global Initiative for Chronic Obstructive Lung Disease POCKET GUIDE TO COPD DIAGNOSIS, MANAGEMENT, AND PREVENTION A Guide for Health Care Professionals. 2017. <http://goldcopd.org/gold-reports-2017/>
- 2 Adeloje D, Chua S, Lee C, *et al*. Global and regional estimates of COPD prevalence: Systematic review and meta-analysis. *J Glob Health* 2015;**5**. doi:10.7189/jogh.05.020415
- 3 Teo W-SK, Tan W-S, Chong W-F, *et al*. Economic burden of chronic obstructive pulmonary disease. *Respirology* 2012;**335**:120–6. doi:10.1111/j.1440-1843.2011.02073.x
- 4 Kauczor H-U, Bonomo L, Gaga M, *et al*. ESR/ERS white paper on lung cancer screening. *Eur Radiol* 2015;**25**:2519–31. doi:10.1007/s00330-015-3697-0
- 5 Jansson SA, Backman H, Stenling A, *et al*. Health economic costs of COPD in Sweden by disease severity - Has it changed during a ten years period? *Respir Med* Published Online First: 2013. doi:10.1016/j.rmed.2013.07.012
- 6 Mclean S, Protti D, Sheikh A. Telehealthcare for long term conditions. *BMJ (Clinical Res ed)*, 2011;**342**:120.
- 7 Sood S, Mbarika V, Jugoo S, *et al*. What Is Telemedicine? A Collection of 104 Peer-Reviewed Perspectives and Theoretical Underpinnings. *Telemed e-Health* 2007;**13**:573–90. doi:10.1089/tmj.2006.0073
- 8 R. W, Wootton R. Twenty years of telemedicine in chronic disease management--an evidence synthesis. *J Telemed Telecare* 2012;**18**:211–20. doi:10.1258/jtt.2012.120219
- 9 Jeppesen E, Kg B, Ge V, *et al*. Hospital at home for acute exacerbations of chronic obstructive pulmonary disease. *Cochrane Database Syst Rev* Published Online First: 2012. doi:10.1002/14651858.CD003573
- 10 Ram FSF, Wedzicha JA, Wright J, *et al*. Hospital at home for patients with acute exacerbations of chronic obstructive pulmonary disease: systematic review of evidence. *BMJ (Clinical Res ed)*, 2004;**329**:315. doi:10.1136/bmj.38159.650347.55
- 11 Alwashmi M, Hawboldt J, Davis E, *et al*. The Effect of Smartphone Interventions on Patients With Chronic Obstructive Pulmonary Disease Exacerbations: A Systematic Review and Meta-Analysis. 2016;**4**. doi:10.2196/mhealth.5921
- 12 Kamei T, Yamamoto Y, Kajii F, *et al*. Systematic review and meta-analysis of studies involving telehome monitoring-based telenursing for patients with chronic obstructive pulmonary disease. *Japan J Nurs Sci* 2013;**10**:180–92. doi:10.1111/j.1742-7924.2012.00228.x
- 13 Hersch RK, Cook RF, Deitz DK, *et al*. Reducing nurses' stress: A randomized controlled trial of a web-based stress management program for nurses. *Appl Nurs Res* 2016;**32**:18–25. doi:10.1016/j.apnr.2016.04.003
- 14 Pedone C, Lelli D. Systematic review of telemonitoring in COPD: An update. *Pneumonol Alergol Pol* 2015;**83**:476–84. doi:10.5603/PiAP.2015.0077
- 15 Kitsiou S, Paré G, Jaana M. Systematic reviews and meta-analyses of home telemonitoring interventions for patients with chronic diseases: A critical assessment of their methodological quality. *J Med Internet Res* 2013;**15**. doi:10.2196/jmir.2770
- 16 Craig P, Dieppe P, Macintyre S, *et al*. Developing and evaluating complex interventions: the new Medical Research Council guidance. 979-983 2008;**337**:979–83. doi:10.1136/bmj.a1655

- 1  
2  
3 17 Tacconelli E. Systematic reviews: CRD's guidance for undertaking reviews in health care. *Lancet Infect Dis* 2010;**10**:226. doi:10.1016/S1473-3099(10)70065-7
- 4  
5 18 Shamseer L, Moher D, Clarke M, *et al*. Preferred reporting items for systematic review and  
6 meta-analysis protocols (PRISMA-P) 2015: elaboration and explanation OPEN ACCESS. *BMJ*  
7 2015;**349**:g7647–g7647. doi:10.1136/bmj.g7647
- 8  
9 19 Moher D, Shamseer L, Clarke M, *et al*. Preferred reporting items for systematic review and  
10 meta-analysis protocols (PRISMA-P) 2015 statement. *Syst Rev* 2015;**4**:1. doi:10.1186/2046-  
11 4053-4-1
- 12  
13 20 Barnes PJ. Mechanisms in COPD Differences From Asthma. *CHEST J*;**117**:10S–14S.
- 14  
15 21 Cruz J, Brooks D, Marques A. Home telemonitoring in COPD: A systematic review of  
16 methodologies and patients' adherence. *Int J Med Inform* 2014;**83**:249–63.  
17 doi:10.1016/j.ijmedinf.2014.01.008
- 18  
19 22 Whitehead AL, Sully BGO, Campbell MJ. Pilot and feasibility studies: Is there a difference from  
20 each other and from a randomised controlled trial? *Contemp Clin Trials* 2014;**38**:130–3.  
21 doi:10.1016/j.cct.2014.04.001
- 22  
23 23 Data Extraction and Assessment Template. Cochrane Public Heal. Gr.  
24 2011.<http://ph.cochrane.org/review-authors>
- 25  
26 24 Cazzola M, MacNee W, Martinez FJ, *et al*. Outcomes for COPD pharmacological trials: From  
27 lung function to biomarkers. *Eur Respir J* 2008;**31**:416–68. doi:10.1183/09031936.00099306
- 28  
29 25 Anthonisen NR, Manfreda J, Warren CPW, *et al*. Antibiotic Therapy in Exacerbations of  
30 Chronic Obstructive Pulmonary Disease. *Ann Intern Med* 1987;**106**:196.
- 31  
32 26 An Outcomes Strategy for COPD and Asthma: NHS Companion Document. NHS Published  
33 Online First: 2012.<https://www.gov.uk/government/publications>
- 34  
35 27 Higgins JPT, Chapter AD. Assessing risk of bias in included studies. In: *Cochrane Handbook for*  
36 *Systematic Reviews of Interventions*. 2008. [www.cochrane-handbook.org](http://www.cochrane-handbook.org)
- 37  
38 28 Ioannidis JPA, Patsopoulos NA, Rothstein HR. Reasons or excuses for avoiding meta-analysis in  
39 forest plots. *BMJ* 2008;**336**:1413–5. doi:10.1136/bmj.a117
- 40  
41 29 John P A Ioannidis, Nikolaos A Patsopoulos E, Evangelou N. Uncertainty in heterogeneity  
42 estimates in meta-analyses. *BMJ* 2007;**335**:914–916. doi:10.1136/bmj.39343.408449.80
- 43  
44 30 Ross S, Curry N, Goodwin N. Case management: What it is and how it can best be  
45 implemented, The King's Fund Paper, November 2011. 2011.
- 46  
47  
48  
49  
50  
51  
52  
53  
54  
55  
56  
57  
58  
59  
60

### Appendix 1: CINAHL data base search

1. (MH "Pulmonary Disease, Chronic Obstructive+")
2. (MH "Lung Diseases, Obstructive")
3. TI ( COPD OR COAD OR COBD OR AECB ) OR AB ( COPD OR COAD OR COBD OR AECB ) **7551**
4. TI ( chronic airway disease OR chronic pulmonary disease or chronic lung disease or emphysema ) OR AB ( chronic airway disease OR chronic pulmonary disease or chronic lung disease or emphysema )
5. TI "chronic\*" W3 "bronchiti\*" OR AB "chronic\*" W3 "bronchiti\*"
6. TI ( "obstruct\*" W3 ("pulmonary" OR "airway\*" OR "airflow\*" OR "lung\*" OR "bronch\*" OR "respirat\*" OR "emphysema\*") ) OR AB ( "obstruct\*" W3 ("pulmonary" OR "airway\*" OR "airflow\*" OR "lung\*" OR "bronch\*" OR "respirat\*" OR "emphysema\*") )
7. S1 OR S2 OR S3 OR S4 OR S5 OR S6
8. (MH "Remote Consultation")
9. (MH "Telemedicine")
10. (MH "Telerehabilitation")
11. (MH "Telemetry")
12. (MH "Videoconferencing")
13. (MH "Monitoring, Physiologic")
14. TI ( remote monitor\* OR remote consult\* OR remote care\* OR council\* ) OR AB ( remote monitor\* OR remote consult\* OR remote care\* OR council\* )
15. TI ( videoconferenc\* OR video group ) OR AB ( videoconferenc\* OR video group )
16. TI ( telemetr\* OR telemat\* OR telemonitor\* OR tele-monitor\* ) OR AB ( telemetr\* OR telemat\* OR telemonitor\* OR tele-monitor\* )
17. TI ( telehome\* OR tele-home OR tele home ) OR AB ( telehome\* OR tele-home OR tele home )
18. TI ( telenurse\* OR telesupport\* OR telecommunic\* ) OR AB ( telenurse\* OR telesupport\* OR telecommunic\* )
19. TI telepharmac\* OR AB telepharmac\*
20. TI ( ehealth\* OR e health\* OR e-health\* ) OR AB ( ehealth\* OR e health\* OR e-health\* )
21. TI ( telehealth OR tele health OR tele-health ) OR AB ( telehealth OR tele health OR tele-health )
22. TI connected health OR AB connected health
23. TI ( telemedicine OR tele medicine OR tele-medicine ) OR AB ( telemedicine OR tele medicine OR tele-medicine )
24. S8 OR S9 OR S10 OR S11 OR S12 OR S13 OR S14 OR S15 OR S16 OR S17 OR S18 OR S19 OR S20 OR S21 OR S22 OR S23
25. TI ( e-coach OR ecoach OR e coach ) OR AB ( e-coach OR ecoach OR e coach )
26. TI ( e-learning OR elearning or e learning ) OR AB ( e-learning OR elearning or e learning )
27. TI ( telemanagem\* OR tele-managem\* ) OR AB ( telemanagem\* OR tele-managem\* )
28. S25 OR S26 OR S27
29. (MH "Decision Support Techniques+")
30. (MH "Drug Therapy, Computer Assisted")
31. (MH "Mobile Applications")
32. (MH "Text Messaging")

- 1  
2  
3 33. TI ( ("cell\*" OR "mobile\*") W3 "phon\*" ) OR AB ( ("cell\*" OR "mobile\*") W3 "phon\*" )  
4 34. TI ( smartphone\* OR smart-phone\* or mobile phone\* ) OR AB ( smartphone\* OR smart-  
5 phone\* or mobile phone\* )  
6 35. TI ( m health\* OR mhealth\* OR m-health\* OR mobile health\* ) OR AB ( m health\* OR  
7 mhealth\* OR m-health\* OR mobile health\* )  
8 36. TI ( handheld\* OR hand held\* ) OR AB ( handheld\* OR hand held\* )  
9 37. TI ( computer\* OR pc OR laptop\* ) OR AB ( computer\* OR pc OR laptop\* )  
10 38. TI ( smart watch\* OR smart-watch\* ) OR AB ( smart watch\* OR smart-watch\* )  
11 39. TI tablet\* OR AB tablet\*  
12 40. S29 OR S30 OR S31 OR S32 OR S33 OR S34 OR S35 OR S36 OR S37 OR S38 OR S39 OR S40  
13 41. S24 OR S28 OR S41  
14  
15  
16  
17  
18 42. S42 AND S7  
19  
20  
21  
22  
23  
24  
25  
26  
27  
28  
29  
30  
31  
32  
33  
34  
35  
36  
37  
38  
39  
40  
41  
42  
43  
44  
45  
46  
47  
48  
49  
50  
51  
52  
53  
54  
55  
56  
57  
58  
59  
60

# BMJ Open

## Telehealth for Chronic Obstructive Pulmonary Disease (COPD) Patients: a Systematic Review and Meta-analysis Protocol

|                                 |                                                                                                                                                                                                                                                                                                                                                                                                                                                                                                                                                                                                                                                                                                                                                                                                                                                                                                                                                                                                                                                                                                                                                                                                                                                  |
|---------------------------------|--------------------------------------------------------------------------------------------------------------------------------------------------------------------------------------------------------------------------------------------------------------------------------------------------------------------------------------------------------------------------------------------------------------------------------------------------------------------------------------------------------------------------------------------------------------------------------------------------------------------------------------------------------------------------------------------------------------------------------------------------------------------------------------------------------------------------------------------------------------------------------------------------------------------------------------------------------------------------------------------------------------------------------------------------------------------------------------------------------------------------------------------------------------------------------------------------------------------------------------------------|
| Journal:                        | <i>BMJ Open</i>                                                                                                                                                                                                                                                                                                                                                                                                                                                                                                                                                                                                                                                                                                                                                                                                                                                                                                                                                                                                                                                                                                                                                                                                                                  |
| Manuscript ID                   | bmjopen-2018-021865.R1                                                                                                                                                                                                                                                                                                                                                                                                                                                                                                                                                                                                                                                                                                                                                                                                                                                                                                                                                                                                                                                                                                                                                                                                                           |
| Article Type:                   | Protocol                                                                                                                                                                                                                                                                                                                                                                                                                                                                                                                                                                                                                                                                                                                                                                                                                                                                                                                                                                                                                                                                                                                                                                                                                                         |
| Date Submitted by the Author:   | 19-Jun-2018                                                                                                                                                                                                                                                                                                                                                                                                                                                                                                                                                                                                                                                                                                                                                                                                                                                                                                                                                                                                                                                                                                                                                                                                                                      |
| Complete List of Authors:       | Gaveikaite, Violeta; Philips Research, ; Aristotle University of Thessaloniki School of Medicine, Lab of Computing and Medical Informatics<br>Fischer, Claudia; Royal Philips Netherlands B.V. acting through Philips Research, Research - Chronic Disease Management; Institut fur Hohere Studien-Institute for Advanced Studies<br>Schonenberg, Helen ; Royal Philips Netherlands B.V. acting through Philips Homecare,<br>Pauws, Steffen; Royal Philips Netherlands B.V. acting through Philips Research, Research - Chronic Disease Management; Tilburg University Tilburg center for Cognition and Communication<br>Kitsiou, Spyros; University of Illinois at Chicago College of Medicine, Chouvarda, Ioanna; Aristotle University of Thessaloniki School of Medicine, Lab of Computing and Medical Informatics<br>Maglaveras, Nicos; Aristotle University of Thessaloniki School of Medicine, Lab of Computing and Medical Informatics; Northwestern university, Department of Industrial Engineering and Management Sciences<br>Roca, Josep; Institut d'Investigacions Biomediques August Pi i Sunyer, Hospital Clinic de Barcelona, Universitat de Barcelona; Center for Biomedical Network Research in Respiratory Diseases (CIBERES), |
| <b>Primary Subject Heading</b>: | Respiratory medicine                                                                                                                                                                                                                                                                                                                                                                                                                                                                                                                                                                                                                                                                                                                                                                                                                                                                                                                                                                                                                                                                                                                                                                                                                             |
| Secondary Subject Heading:      | Evidence based practice, Patient-centred medicine, Health informatics                                                                                                                                                                                                                                                                                                                                                                                                                                                                                                                                                                                                                                                                                                                                                                                                                                                                                                                                                                                                                                                                                                                                                                            |
| Keywords:                       | chronic obstructive pulmonary disease, telehealth, systematic review, meta-analysis, Telemedicine < BIOTECHNOLOGY & BIOINFORMATICS                                                                                                                                                                                                                                                                                                                                                                                                                                                                                                                                                                                                                                                                                                                                                                                                                                                                                                                                                                                                                                                                                                               |
|                                 |                                                                                                                                                                                                                                                                                                                                                                                                                                                                                                                                                                                                                                                                                                                                                                                                                                                                                                                                                                                                                                                                                                                                                                                                                                                  |

SCHOLARONE™  
Manuscripts



# Telehealth for Chronic Obstructive Pulmonary Disease (COPD) Patients: A Systematic Review and Meta-analysis Protocol

## Authors

Violeta Gaveikaite<sup>1,2</sup>, Claudia Fischer<sup>2,6</sup>, Helen Schonenberg<sup>2</sup>, Steffen Pauws<sup>2,3</sup>, Spyros Kitsiou<sup>4</sup>, Ioanna Chouvarda<sup>1</sup>, Nicos Maglaveras<sup>1,5</sup>, Josep Roca<sup>7</sup>

## Affiliations

1 Laboratory of Computing, Medical Informatics and Biomedical Imaging Technologies, Aristotle University of Thessaloniki, Thessaloniki, Greece

2 Philips Research, Eindhoven, The Netherlands

3 Tilburg Center for Communication and Cognition, Tilburg University, Tilburg, The Netherlands

4 Department of Biomedical and Health Information Sciences, University of Illinois at Chicago, Chicago, USA

5 Departement of IEMS in McCormick School of Engineering, Northwestern University, Evanston, USA

6 Department of Health Economics, Centre for Public Health, Medical University of Vienna, Vienna, Austria

7 Servicio de Neumología, Hospital Clínic de Barcelona, Barcelona, Spain

## Corresponding author

Violeta Gaveikaite; HTC 34, 1.057, Eindhoven, The Netherlands, tel.nr +31 (0)70 770 9180, violeta.gaveikaite@philips.com

## Keywords

Meta-analysis, systematic review, telemedicine, telehealth, chronic obstructive pulmonary disease

## Word count

2262

## Study registration number:

International Prospective Register for Systematic Reviews (PROSPERO): CRD42018083671.

## ABSTRACT

### Introduction

Chronic Obstructive Pulmonary Disease (COPD) is a highly prevalent chronic disease characterized by persistent respiratory symptoms. A focus of COPD interventional studies is directed towards prevention of exacerbations leading to hospital readmissions. Telehealth as a method of remote patient monitoring and care delivery may be implemented to reduce hospital readmissions and improve self-management of disease. Prior reviews have not systematically assessed the efficacies of various telehealth functionalities on COPD patients at different stages of disease severity. We aim to evaluate which COPD telehealth interventions, classified by their functionalities, are most effective in improving COPD patient management measured by both clinical and resource utilization outcomes.

### Methods and analysis

We will conduct a systematic review which will include randomized controlled trials comparing the efficacy of telehealth interventions versus standard care in COPD patients with confirmed disease severity based on FEV% levels. An electronic search strategy will be used to identify trials published since 2000 in MEDLINE, EMBASE, the Cochrane Central Register of Controlled Trials (CENTRAL), CINHAL. Telehealth is described as remote monitoring and delivery of care where patient data/clinical information is routinely or continuously collected and/or processed, presented to the patient, and transferred to a clinical care institution for feedback, triage, and intervention by a clinical specialist. Two authors will independently screen articles for inclusion, assess risk of bias, and extract data. We will merge studies into a meta-analysis if the interventions, technologies, participants, and underlying clinical questions are homogenous enough. We will use a random-effects model, as we expect some heterogeneity between interventions. In cases where a meta-analysis is not possible, we will synthesize findings narratively. We will assess the quality of the evidence for the main outcomes using GRADE.

### Ethics and Dissemination

Research ethics approval is not required. The findings will be disseminated through publication in a peer-reviewed journal.

### Word count

300

**Strengths and limitations of this study**

- This systematic review will update the knowledge on efficacy of telehealth interventions in management of COPD patients. We will propose to look at all telehealth applications and functionalities and to provide a typology for the telehealth interventions of the COPD patient's remote service delivery
- This article will help clinicians working in the COPD field to select the most effective telehealth intervention for the different COPD severity groups to improve COPD management;
- We expect to provide robust evidence supporting the successful implementation of telehealth services to remotely manage COPD patients, despite considerable heterogeneity in the reporting of published clinical trials and limited data.

## INTRODUCTION

Chronic Obstructive Pulmonary Disease (COPD) is a highly prevalent disease that is characterized by persistent respiratory symptoms due to airway and/or alveolar abnormalities caused by significant exposure to noxious particles or gases.[1] COPD results in high societal healthcare expenditures and resource utilization.[2, 3] The estimated annual economic burden of COPD in terms of conventional direct costs (healthcare utilization) and indirect costs (lost production) is approximately 141.4 billion euros in Europe (2011).[4] Where the main costs of COPD are strongly related to disease severity, the other major components of direct costs are hospitalizations (for very severe COPD) and medication (all other severity stages).[5]

Telehealth involves the remote exchange of data between patients and healthcare professionals as part of the patient's disease status and healthcare management.[6, 7] Telehealth interventions for management of COPD patients were introduced more than 20 years ago, but the evidence for the value of telehealth is limited and contradictory.[8] Published systematic reviews on telehealth interventions for the clinical management of COPD patients only focus on the application of specific services (e.g. 'hospital to home')[9, 10], specific functions (e.g. smart phone intervention)[11, 12], or the experience of clinical professionals (e.g. nursing professionals).[13] Even if recent systematic reviews [14–16] focus on a particular telehealth application or functionality, a lack of established taxonomy in the field greatly limits their value for clinicians. In our systematic review, we propose to look at all telehealth applications and functionalities, as well as to provide a typology for the telehealth interventions of the COPD patient's remote service delivery. This will allow us to describe the use of different telehealth functions across a range of healthcare fields, from health behavior change interventions to remote patients monitoring such as vital signs observations. This allows us to focus on similarities in mechanisms of action for a particular device or function and to suggest where it might be useful in new remote service selections; all towards the clinical management of COPD patients. A number of systematic reviews have evaluated the efficacy of telehealth interventions on clinical outcomes in patients diagnosed with COPD.[14–16] However, the findings vary widely; they are diverse[13, 17], and of poor methodological quality.[18] This may be due to lack of reporting on important patient characteristics, lack of validated data collection instruments, and lack of high quality reporting. [12, 17] However, telehealth interventions are very complex to evaluate because of their dynamic nature; they are designed for a very specific setting; their efficacy is impacted by the behavior of those delivering who might be resistant to new ICT applications, as well as those receiving the intervention who might fail to comply.[18, 19] This lack of evidence acts as a barrier for further deployment or scaling up of telehealth services.

## OBJECTIVES

The aim of this systematic review will be 1) describe how telehealth may be used for the remote management of COPD patients that have been evaluated in randomized controlled trials, 2) derive typology on these telehealth solutions for COPD patients' remote management based on their application for clinical services and specific functionalities, and 3) assess the effectiveness of telehealth solutions for improving health and health service outcomes in COPD patients stratified according to disease severity.

## METHODS

This systematic review protocol was registered in the Prospero Registry (Number obtained: CRD42018083671). The systematic review will be conducted according to the Cochrane Handbook for Systematic Reviews of Interventions [20] and reported according to the PRISMA-P (the Preferred Reporting Items for Systematic reviews and Meta-Analyses for Protocols 2015) methodology.[21], [22]

## Eligibility criteria

1  
2  
3 The PICO components (Population, Intervention, Comparator and Outcomes) and study design were  
4 used to define study selection criteria for eligibility.  
5

### 6 **Participants**

7 Eligible for inclusion are studies involving patients with a COPD diagnosis based on reported FEV<sub>1</sub>%  
8 (or reported as a COPD GOLD grade). [1] If a reported patient population is mixed, for instance  
9 including patients presenting with asthma, this study will be excluded.[23] Studies that include  
10 additional medical conditions as well as COPD will be retained if the outcomes specific to the COPD  
11 group are reported separately.  
12

### 13 **Intervention group: telehealth services**

14 The intervention group is described as patients receiving telehealth as part of a COPD management  
15 plan. Telehealth involves the remote exchange of data between a patient and healthcare  
16 professionals as part of the patient's disease status and healthcare management.[6, 7]

17 The telehealth intervention can involve any IT tool designed for clinical support: an assessment,  
18 consultation, triage or intervention performed by the care provider (telemedicine nurse, clinician or  
19 service provider, or back-office feedback).

20 The telehealth component of the management plan may consist of the following functional  
21 components: care provider consultations, vital signs monitoring, education/prevention modules,  
22 lifestyle coaching, etc. We will exclude studies reporting home mechanical ventilation procedures.  
23  
24

### 25 **Comparator: standard care**

26 The definition of standard care, if retrievable, will be reported. Standard care is controversial and  
27 may vary widely between hospitals and countries[24] therefore we include the study if a description  
28 of the care has been provided without further restrictions on the type of standard care (care without  
29 telehealth component).  
30

### 31 **Study design**

32 Eligible studies for inclusion are:

- 33 • Randomized clinical trials (RCTs);
- 34 • Cluster RCTs;
- 35 • Controlled trials, if they have a randomization component (feasibility and pilots studies are  
36 included[25])  
37

### 38 **Search strategy**

#### 39 *Electronic databases*

40 Studies will be identified through systematic searches of the following electronic databases:  
41 MEDLINE via PubMed, EMBASE, The Cochrane Central Register of Controlled Trials (CENTRAL) and  
42 CINAHL. The preliminary search strategy for CINAHL (Appendix 1) will be adapted for use in the other  
43 databases. The Cochrane sensitivity-maximizing RCT filter will be applied to MEDLINE and  
44 adaptations of it to the other databases except CENTRAL. We will search all databases from 2000 to  
45 the present and will impose no restriction on language.  
46  
47

#### 48 *Hand searching literature*

49 We will supplement the main search strategy with manual searches of reference lists of all relevant  
50 primary studies and systematic reviews to identify any additional studies not captured by our original  
51 search. We will also contact field experts and search the ClinicalTrials.gov Registry for potentially  
52 eligible studies.  
53

### 54 **Reference management**

55  
56  
57  
58  
59  
60

1  
2  
3 The bibliographic details of all retrieved articles will be stored in Mendeley, a reference management  
4 software package. Duplicates will be identified and removed using the Mendeley reference  
5 management software.

### 7 **Study selection and data extraction strategy**

#### 8 *Screening and selection of studies*

9 Two authors will independently assess the title and abstract of all identified papers as well as the  
10 articles that passed the title and abstract screening based on pre-defined eligibility criteria. Any  
11 disagreements between reviewers will be resolved through discussion or adjudication by a third  
12 reviewer. The data extraction form [26] will be adapted to our systematic review and adjusted for  
13 optimal data collection through a pilot of several full texts of several included RCTs. Any  
14 disagreement arising in the full text screening stage between reviewers will be resolved through  
15 discussion. If agreement cannot be reached, a third reviewer will mediate. All studies that do not  
16 fulfil all of the criteria will be excluded and the reasons for their exclusion will be noted. We will  
17 identify and collate multiple reports of the same study so that each study is the unit of interest in the  
18 review, rather than each report.

#### 20 *Data extraction and management*

21 Data will be independently extracted from the included studies by the first author (VG) and recorded  
22 on a predesigned extraction form. A second reviewer will check the data for consistency against the  
23 published manuscripts to identify any errors. In case of missing data, we will contact the  
24 corresponding authors of the included studies where possible. Among other elements, the following  
25 data will be captured from studies to be included in the review:

- 26 1) Study characteristics: study design, comparator, duration, sample size, setting, country;
- 27 2) Participant characteristics: age and sex; FEV%, comorbidities, asthma profile (with/without),  
28 smoking status
- 29 3) Intervention characteristics: functionality description (goal, technical details, how service works),  
30 how data is collected, how data is reported, adverse events reporting, sustainability of intervention,  
31 and
- 32 4) Feedback criteria: healthcare provider; timing: synchronous or asynchronous; nature: manual or  
33 automated;
- 34 Valuable qualitative data, such as patient safety will be extracted.

### 37 **Outcomes: Clinical outcomes collection**

38 Six outcomes, commonly reported in COPD clinical trials, were selected to provide relevant  
39 information regarding our research question. Studies will be included if at least one of these six  
40 outcomes were reported.[27]

#### 42 *Primary outcomes*

43 Hospital readmissions: COPD-related hospitalizations and hospitalization causes will be reported. We  
44 will differentiate between count and dichotomous data (e.g. number of events in each intervention  
45 group vs the number of participants in each intervention group who experience at least one event ).  
46 Exacerbations: Exacerbation rate is a commonly reported outcome.[27] The definition of  
47 exacerbations and their severity needs to be standardized to allow comparisons between different  
48 interventions in different settings.[28, 29] As exacerbations can be reported in different ways, the  
49 data collection form allows the following to be recorded: number of exacerbations, or exacerbation  
50 rate (e.g. it can be classified based on patient disease severity as well).  
51 All-cause mortality: Number of patients who died during the study per study group.

#### 54 *Secondary outcomes*

55 Health-related Quality of Life (HRQoL): disease specific or non-disease specific quality of life reported  
56 by a validated instrument.

1  
2  
3 Physical activity measurements: any type reported by validated measurement.  
4 COPD related costs: total and program related and indirect costs if available.  
5

### 6 **Risk of bias assessment**

7 Two authors will independently assess risk of bias for each study included in the review using the  
8 Cochrane Collaboration Risk of Bias criteria, which assesses the following domains: sequence  
9 generation, allocation concealment, blinding of participants and personnel (performance bias),  
10 blinding of outcome assessment, whether incomplete outcome data were adequately addressed, and  
11 whether there was selective outcome reporting.[30]

12 In accordance with the Cochrane risk of bias assessment tool, we will grade each potential source of  
13 bias as high, low or unclear and provide a quote from the study report together with a justification  
14 for our judgment in the 'Risk of bias' table.  
15

### 16 **Data synthesis**

17 Risk Ratios (RR) will be determined for outcome measures of dichotomous variables. Where possible,  
18 RR will be pooled using a random effects model. The standard mean difference will be calculated for  
19 continuous data variables in the absence of significant clinical heterogeneity.[31] Statistical  
20 heterogeneity will be analyzed using the I<sup>2</sup> statistic. To confirm reliability of the summary estimate,  
21 95% confidence intervals (CI) will be calculated. If there is important clinical heterogeneity among the  
22 included studies, or data are reported using different scales, we will provide a qualitative summary of  
23 the findings of the studies by direction of effect and/or statistical significance.  
24  
25

### 26 **Quality of Evidence Assessment**

27 A Quality of Evidence Assessment is performed to determine the extent to which we can be  
28 confident that an estimate of effect is close to the true quantity/value, i.e. it is not distorted by  
29 internal or external bias within and across studies. The assessment will be done with the GRADE  
30 system.[32] Quality of evidence assessment will be performed by outcome of interest.  
31

### 32 **Dealing with missing data**

33 Authors will be contacted to obtain unreported data.  
34

### 35 **Assessment of heterogeneity and reporting biases**

36 We will assess clinical heterogeneity between studies by comparing the characteristics of the study  
37 populations, interventions, and outcome measures. Statistical heterogeneity will be assessed with  
38 the I<sup>2</sup> and  $\chi^2$  (chi-square) statistic measures. The assessment of reporting biases for the primary  
39 outcomes of interest will be explored using funnel plots if we are able to pool more than 10 trials per  
40 outcome of interest.  
41  
42

### 43 **Patients and Public Involvement**

44 This is a protocol for a systematic review of prior randomized controlled trials. Therefore, no human  
45 subjects/patients were directly involved in the design and/or execution of this research study. A plain  
46 language summary with the main findings of the review will be provided in a straightforward style  
47 that can be understood by consumers of health care.  
48  
49  
50  
51  
52  
53  
54  
55  
56  
57  
58  
59  
60

## DISCUSSION

Overall, the systematic review outlined in this protocol aims to identify, assess, and synthesize using meta-analytic methods available in the evidence of the effects of telehealth interventions for the management of COPD patients. Our systematic review will evaluate which COPD telehealth interventions, classified by their functionalities, are most effective in improving COPD patient management measured by both clinical and resource utilization outcomes. It will allow better clinical service selection, which aims to tailor the telehealth services to the specific COPD disease severity and patient needs.[33] Based on published randomized clinical trials, it will describe the telehealth solutions usability and efficacy in terms of clinical outcomes and service utilization for the COPD patients' remote management. Clinical outcomes reporting will be focused on the patient profile (comorbidities, FEV%, and no asthma cases) which strengthens this systematic review and facilitates the evidence implementation in a future individual patient service selection procedure.

Heterogeneous reporting in trials on telehealth, and the limited number of trials for some of the interventions, which are foreseen based on a scoping search, may limit our ability to draw conclusions on telehealth efficacy following the meta-analysis. The gathered information will help to derive the typology of telehealth solutions for COPD patients' remote management based on their application for the clinical services and specific functionalities



**Ethics and dissemination**

Violeta Gaveikaite, Steffen Pauws and Helen Schonenberg are employees of Philips research, Eindhoven, the Netherlands. Other authors declare that they have no conflict of interest. No research ethics approval is required for this systematic review as no confidential patient data will be used. The findings will be disseminated through publication in a peer-reviewed journal.

**Acknowledgements**

The authors thank the reviewers of the manuscript for their constructive feedback.

**Authors' contributions**

VG, SK, SP, HS, CF, NM developed the idea and designed the study protocol. VG, SK designed and wrote the search strategy and the first protocol draft; VG, SK, SP planned the data extraction and statistical analysis; HS, IC, SP, JR, NM provided critical insights. All authors have approved and contributed to the final written manuscript.

**Funding**

This publication has received funding from the European Union's Horizon 2020 research and innovation programme - Marie Skłodowska-Curie Actions grant agreement no. 676201 - CHESS - Connected Health Early Stage Researcher Support System.

## REFERENCES

- [1] "Global Initiative for Chronic Obstructive Lung Disease Global Initiative for Chronic Obstructive Lung Disease POCKET GUIDE TO COPD DIAGNOSIS, MANAGEMENT, AND PREVENTION A Guide for Health Care Professionals," 2017.
- [2] D. Adeloye *et al.*, "Global and regional estimates of COPD prevalence: Systematic review and meta-analysis," *J. Glob. Health*, vol. 5, no. 2, 2015.
- [3] W.-S. K. Teo *et al.*, "Economic burden of chronic obstructive pulmonary disease," *Respirology*, vol. 335, no. 7626, pp. 120–6, 2012.
- [4] H.-U. Kauczor *et al.*, "ESR/ERS white paper on lung cancer screening," *Eur. Radiol.*, vol. 25, no. 9, pp. 2519–2531, 2015.
- [5] S. A. Jansson, H. Backman, A. Stenling, A. Lindberg, E. Rönmark, and B. Lundbäck, "Health economic costs of COPD in Sweden by disease severity - Has it changed during a ten years period?," *Respir. Med.*, 2013.
- [6] S. Mclean, D. Protti, and A. Sheikh, "Telehealthcare for long term conditions," *BMJ (Clinical Res. ed.)*, vol. 342, p. 120, 2011.
- [7] S. Sood *et al.*, "What Is Telemedicine? A Collection of 104 Peer-Reviewed Perspectives and Theoretical Underpinnings," *Telemed. e-Health*, vol. 13, no. 5, pp. 573–590, Oct. 2007.
- [8] W. R. and R. Wootton, "Twenty years of telemedicine in chronic disease management--an evidence synthesis," *J. Telemed. Telecare*, vol. 18, no. 4, pp. 211–20, 2012.
- [9] E. Jeppesen *et al.*, "Hospital at home for acute exacerbations of chronic obstructive pulmonary disease," *Cochrane Database Syst. Rev.*, no. 5, 2012.
- [10] F. S. F. Ram, J. A. Wedzicha, J. Wright, and M. Greenstone, "Hospital at home for patients with acute exacerbations of chronic obstructive pulmonary disease: systematic review of evidence," *BMJ (Clinical Res. ed.)*, vol. 329, no. September 2007, p. 315, 2004.
- [11] M. Alwashmi *et al.*, "The Effect of Smartphone Interventions on Patients With Chronic Obstructive Pulmonary Disease Exacerbations: A Systematic Review and Meta-Analysis," vol. 4, no. 4, 2016.
- [12] T. Kamei, Y. Yamamoto, F. Kajii, Y. Nakayama, and C. Kawakami, "Systematic review and meta-analysis of studies involving telehome monitoring-based telenursing for patients with chronic obstructive pulmonary disease," *Japan J. Nurs. Sci.*, vol. 10, no. 2, pp. 180–192, 2013.
- [13] R. K. Hersch *et al.*, "Reducing nurses' stress: A randomized controlled trial of a web-based stress management program for nurses," *Appl. Nurs. Res.*, vol. 32, pp. 18–25, 2016.
- [14] J. Polisena *et al.*, "Home telehealth for chronic obstructive pulmonary disease: a systematic review and meta-analysis," *J. Telemed. Telecare*, vol. 16, no. 3, pp. 120–127, 2010.
- [15] S. Lundell *et al.*, "Telehealthcare in COPD: A systematic review and meta-analysis on physical outcomes and dyspnea," *Respir. Med.*, vol. 109, no. 1, pp. 11–26, 2015.
- [16] S. McLean, U. Nurmatov, J. L. Liu, C. Pagliari, J. Car, and A. Sheikh, "Telehealthcare for chronic obstructive pulmonary disease.," *Cochrane database Syst. Rev.*, no. 7, p. CD007718, Jul. 2011.
- [17] C. Pedone and D. Lelli, "Systematic review of telemonitoring in COPD: An update," *Pneumonol. Alergol. Pol.*, vol. 83, pp. 476–484, 2015.
- [18] S. Kitsiou, G. Paré, and M. Jaana, "Systematic reviews and meta-analyses of home telemonitoring interventions for patients with chronic diseases: A critical assessment of their

- methodological quality," *J. Med. Internet Res.*, vol. 15, no. 7, 2013.
- [19] P. Craig, P. Dieppe, S. Macintyre, S. Michie, I. Nazareth, and M. Petticrew, "Developing and evaluating complex interventions: the new Medical Research Council guidance," *979-983*, vol. 337, no. 337 (2008), pp. 979–983, 2008.
- [20] E. Tacconelli, "Systematic reviews: CRD's guidance for undertaking reviews in health care," *Lancet Infect. Dis.*, vol. 10, no. 4, p. 226, 2010.
- [21] L. Shamseer *et al.*, "Preferred reporting items for systematic review and meta-analysis protocols (PRISMA-P) 2015: elaboration and explanation OPEN ACCESS," *BMJ*, vol. 349, pp. g7647–g7647, 2015.
- [22] D. Moher *et al.*, "Preferred reporting items for systematic review and meta-analysis protocols (PRISMA-P) 2015 statement," *Syst. Rev.*, vol. 4, no. 1, p. 1, 2015.
- [23] P. J. Barnes, "Mechanisms in COPD Differences From Asthma," *CHEST J.*, vol. 117, p. 10S–14S.
- [24] J. Cruz, D. Brooks, and A. Marques, "Home telemonitoring in COPD: A systematic review of methodologies and patients' adherence," *Int. J. Med. Inform.*, vol. 83, no. 4, pp. 249–263, 2014.
- [25] A. L. Whitehead, B. G. O. Sully, and M. J. Campbell, "Pilot and feasibility studies: Is there a difference from each other and from a randomised controlled trial?," *Contemp. Clin. Trials*, vol. 38, no. 1, pp. 130–133, 2014.
- [26] "Data Extraction and Assessment Template," *Cochrane Public Health Group*, 2011. [Online]. Available: <http://ph.cochrane.org/review-authors>.
- [27] M. Cazzola *et al.*, "Outcomes for COPD pharmacological trials: From lung function to biomarkers," *Eur. Respir. J.*, vol. 31, no. 2, pp. 416–468, 2008.
- [28] N. R. Anthonisen *et al.*, "Antibiotic Therapy in Exacerbations of Chronic Obstructive Pulmonary Disease," *Ann. Intern. Med.*, vol. 106, no. 2, p. 196, 1987.
- [29] "An Outcomes Strategy for COPD and Asthma: NHS Companion Document," *NHS*, 2012.
- [30] Higgins JPT and A. D. Chapter, "Assessing risk of bias in included studies," in *Cochrane Handbook for Systematic Reviews of Interventions*, 5.0.1., 2008.
- [31] J. P. A. Ioannidis, N. A. Patsopoulos, and H. R. Rothstein, "Reasons or excuses for avoiding meta-analysis in forest plots," *BMJ*, vol. 336, no. 7658, pp. 1413–1415, 2008.
- [32] E. John P A Ioannidis, Nikolaos A Patsopoulos and N. Evangelou, "Uncertainty in heterogeneity estimates in meta-analyses," *BMJ*, vol. 335, no. 3 NOVEMBER, pp. 914–916, 2007.
- [33] S. Ross, N. Curry, and N. Goodwin, "Case management: What it is and how it can best be implemented, The King's Fund Paper, November 2011," 2011.

### Appendix 1: CINAHL data base search

1. (MH "Pulmonary Disease, Chronic Obstructive+")
2. (MH "Lung Diseases, Obstructive")
3. TI ( COPD OR COAD OR COBD OR AECB ) OR AB ( COPD OR COAD OR COBD OR AECB ) **7551**
4. TI ( chronic airway disease OR chronic pulmonary disease or chronic lung disease or emphysema ) OR AB ( chronic airway disease OR chronic pulmonary disease or chronic lung disease or emphysema )
5. TI "chronic\*" W3 "bronchiti\*" OR AB "chronic\*" W3 "bronchiti\*"
6. TI ( "obstruct\*" W3 ("pulmonary" OR "airway\*" OR "airflow\*" OR "lung\*" OR "bronch\*" OR "respirat\*" OR "emphysema\*") ) OR AB ( "obstruct\*" W3 ("pulmonary" OR "airway\*" OR "airflow\*" OR "lung\*" OR "bronch\*" OR "respirat\*" OR "emphysema\*") )
7. S1 OR S2 OR S3 OR S4 OR S5 OR S6
8. (MH "Remote Consultation")
9. (MH "Telemedicine")
10. (MH "Telerehabilitation")
11. (MH "Telemetry")
12. (MH "Videoconferencing")
13. (MH "Monitoring, Physiologic")
14. TI ( remote monitor\* OR remote consult\* OR remote care\* OR council\* ) OR AB ( remote monitor\* OR remote consult\* OR remote care\* OR council\* )
15. TI ( videoconferenc\* OR video group ) OR AB ( videoconferenc\* OR video group )
16. TI ( telemetr\* OR telemat\* OR telemonitor\* OR tele-monitor\* ) OR AB ( telemetr\* OR telemat\* OR telemonitor\* OR tele-monitor\* )
17. TI ( telehome\* OR tele-home OR tele home ) OR AB ( telehome\* OR tele-home OR tele home )
18. TI ( telenurse\* OR telesupport\* OR telecommunic\* ) OR AB ( telenurse\* OR telesupport\* OR telecommunic\* )
19. TI telepharmac\* OR AB telepharmac\*
20. TI ( ehealth\* OR e health\* OR e-health\* ) OR AB ( ehealth\* OR e health\* OR e-health\* )
21. TI ( telehealth OR tele health OR tele-health ) OR AB ( telehealth OR tele health OR tele-health )
22. TI connected health OR AB connected health
23. TI ( telemedicine OR tele medicine OR tele-medicine ) OR AB ( telemedicine OR tele medicine OR tele-medicine )
24. S8 OR S9 OR S10 OR S11 OR S12 OR S13 OR S14 OR S15 OR S16 OR S17 OR S18 OR S19 OR S20 OR S21 OR S22 OR S23
25. TI ( e-coach OR ecoach OR e coach ) OR AB ( e-coach OR ecoach OR e coach )
26. TI ( e-learning OR elearning or e learning ) OR AB ( e-learning OR elearning or e learning )
27. TI ( telemanagem\* OR tele-managem\* ) OR AB ( telemanagem\* OR tele-managem\* )
28. S25 OR S26 OR S27
29. (MH "Decision Support Techniques+")
30. (MH "Drug Therapy, Computer Assisted")
31. (MH "Mobile Applications")
32. (MH "Text Messaging")

- 1  
2  
3 33. TI ( ("cell\*" OR "mobile\*") W3 "phon\*" ) OR AB ( ("cell\*" OR "mobile\*") W3 "phon\*" )  
4 34. TI ( smartphone\* OR smart-phone\* or mobile phone\* ) OR AB ( smartphone\* OR smart-  
5 phone\* or mobile phone\* )  
6 35. TI ( m health\* OR mhealth\* OR m-health\* OR mobile health\* ) OR AB ( m health\* OR  
7 mhealth\* OR m-health\* OR mobile health\* )  
8 36. TI ( handheld\* OR hand held\* ) OR AB ( handheld\* OR hand held\* )  
9 37. TI ( computer\* OR pc OR laptop\* ) OR AB ( computer\* OR pc OR laptop\* )  
10 38. TI ( smart watch\* OR smart-watch\* ) OR AB ( smart watch\* OR smart-watch\* )  
11 39. TI tablet\* OR AB tablet\*  
12 40. S29 OR S30 OR S31 OR S32 OR S33 OR S34 OR S35 OR S36 OR S37 OR S38 OR S39 OR S40  
13 41. S24 OR S28 OR S41  
14  
15  
16  
17  
18 42. S42 AND S7  
19  
20  
21  
22  
23  
24  
25  
26  
27  
28  
29  
30  
31  
32  
33  
34  
35  
36  
37  
38  
39  
40  
41  
42  
43  
44  
45  
46  
47  
48  
49  
50  
51  
52  
53  
54  
55  
56  
57  
58  
59  
60

**PRISMA-P (Preferred Reporting Items for Systematic review and Meta-Analysis Protocols) 2015 checklist: recommended items to address in a systematic review protocol\***

| Section and topic                 | Item No | Checklist item                                                                                                                                                                                                                | Page (in the submitted manuscript) |
|-----------------------------------|---------|-------------------------------------------------------------------------------------------------------------------------------------------------------------------------------------------------------------------------------|------------------------------------|
| <b>ADMINISTRATIVE INFORMATION</b> |         |                                                                                                                                                                                                                               |                                    |
| Title:                            |         |                                                                                                                                                                                                                               |                                    |
| Identification                    | 1a      | Identify the report as a protocol of a systematic review                                                                                                                                                                      | 1                                  |
| Update                            | 1b      | If the protocol is for an update of a previous systematic review, identify as such                                                                                                                                            | NA                                 |
| Registration                      | 2       | If registered, provide the name of the registry (such as PROSPERO) and registration number (CRD42018083671)                                                                                                                   | 1,4                                |
| Authors:                          |         |                                                                                                                                                                                                                               |                                    |
| Contact                           | 3a      | Provide name, institutional affiliation, e-mail address of all protocol authors; provide physical mailing address of corresponding author                                                                                     | 1                                  |
| Contributions                     | 3b      | Describe contributions of protocol authors and identify the guarantor of the review                                                                                                                                           | 9                                  |
| Amendments                        | 4       | If the protocol represents an amendment of a previously completed or published protocol, identify as such and list changes; otherwise, state plan for documenting important protocol amendments                               | NA                                 |
| Support:                          |         |                                                                                                                                                                                                                               |                                    |
| Sources                           | 5a      | Indicate sources of financial or other support for the review                                                                                                                                                                 | 9                                  |
| Sponsor                           | 5b      | Provide name for the review funder and/or sponsor                                                                                                                                                                             | 9                                  |
| Role of sponsor or funder         | 5c      | Describe roles of funder(s), sponsor(s), and/or institution(s), if any, in developing the protocol                                                                                                                            | 9                                  |
| <b>INTRODUCTION</b>               |         |                                                                                                                                                                                                                               |                                    |
| Rationale                         | 6       | Describe the rationale for the review in the context of what is already known                                                                                                                                                 | 4                                  |
| Objectives                        | 7       | Provide an explicit statement of the question(s) the review will address with reference to participants, interventions, comparators, and outcomes (PICO)                                                                      | 4-5                                |
| <b>METHODS</b>                    |         |                                                                                                                                                                                                                               |                                    |
| Eligibility criteria              | 8       | Specify the study characteristics (such as PICO, study design, setting, time frame) and report characteristics (such as years considered, language, publication status) to be used as criteria for eligibility for the review | 5                                  |
| Information sources               | 9       | Describe all intended information sources (such as electronic databases, contact with study authors, trial registers or other grey literature sources) with planned dates of coverage                                         | 6                                  |
| Search strategy                   | 10      | Present draft of search strategy to be used for at least one electronic database, including planned limits, such that it could be repeated                                                                                    | 12-13                              |
| Study records:                    |         |                                                                                                                                                                                                                               |                                    |
| Data management                   | 11a     | Describe the mechanism(s) that will be used to manage records and data throughout the review                                                                                                                                  | 6                                  |

1  
2  
3  
4  
5  
6  
7  
8  
9  
10  
11  
12  
13  
14  
15  
16  
17  
18  
19  
20  
21  
22  
23  
24  
25  
26  
27  
28  
29  
30  
31  
32  
33  
34  
35  
36  
37  
38  
39  
40  
41  
42  
43  
44  
45  
46  
47

|                                    |     |                                                                                                                                                                                                                      |     |
|------------------------------------|-----|----------------------------------------------------------------------------------------------------------------------------------------------------------------------------------------------------------------------|-----|
| Selection process                  | 11b | State the process that will be used for selecting studies (such as two independent reviewers) through each phase of the review (that is, screening, eligibility and inclusion in meta-analysis)                      | 6   |
| Data collection process            | 11c | Describe planned method of extracting data from reports (such as piloting forms, done independently, in duplicate), any processes for obtaining and confirming data from investigators                               | 6   |
| Data items                         | 12  | List and define all variables for which data will be sought (such as PICO items, funding sources), any pre-planned data assumptions and simplifications                                                              | 6   |
| Outcomes and prioritization        | 13  |                                                                                                                                                                                                                      | 6   |
| Risk of bias in individual studies | 14  |                                                                                                                                                                                                                      | 6   |
| Data synthesis                     | 15a | List and define all outcomes for which data will be sought, including prioritization of main and additional outcomes, with rationale                                                                                 | 6-7 |
|                                    | 15b | Describe anticipated methods for assessing risk of bias of individual studies, including whether this will be done at the outcome or study level, or both; state how this information will be used in data synthesis | 6-7 |
|                                    | 15c | Describe any proposed additional analyses (such as sensitivity or subgroup analyses, meta-regression)                                                                                                                | 6-7 |
|                                    | 15d | If quantitative synthesis is not appropriate, describe the type of summary planned                                                                                                                                   | 7   |
| Meta-bias(es)                      | 16  | Specify any planned assessment of meta-bias(es) (such as publication bias across studies, selective reporting within studies)                                                                                        | 6-7 |
| Confidence in cumulative evidence  | 17  | Describe how the strength of the body of evidence will be assessed (such as GRADE)                                                                                                                                   | 7   |

**\* It is strongly recommended that this checklist be read in conjunction with the PRISMA-P Explanation and Elaboration (cite when available) for important clarification on the items. Amendments to a review protocol should be tracked and dated. The copyright for PRISMA-P (including checklist) is held by the PRISMA-P Group and is distributed under a Creative Commons Attribution Licence 4.0.**

*From: Shamseer L, Moher D, Clarke M, Ghersi D, Liberati A, Petticrew M, Shekelle P, Stewart L, PRISMA-P Group. Preferred reporting items for systematic review and meta-analysis protocols (PRISMA-P) 2015: elaboration and explanation. BMJ. 2015 Jan 2;349(jan02 1):g7647.*
